# Supplementary material
Source: publisher figshare collection journal article supplement (https://frontiersin.figshare.com/ndownloader/files/24688064)
Supplement: Supplementary file 1 [file 24688064]

## Supplementary material: Appendix 1

Interview Schedule: semi-structured

|     |                                                                                                                                                                                                            |
|-----|------------------------------------------------------------------------------------------------------------------------------------------------------------------------------------------------------------|
| Q1. | What public communication have you undertaken in the past about water scarcity or drought?                                                                                                                 |
| Q2. | Have you undertaken any communications with the public about water scarcity or water saving that have shown to have an impact on behavior? Could you tell us about them?                                   |
| Q3. | At what point in the drought cycle would you typically start to communicate with the public about emerging droughts?                                                                                       |
| Q4. | Thinking more specifically about your customers, are there particular groups that you find easy to communicate with about water saving or water scarcity?                                                  |
| Q5. | Are there groups which are particularly challenging to communicate with? Have you found any communications that work with any of these groups?                                                             |
| Q6. | In your opinion, what kinds of <i>messages</i> [themes] <i>and formats</i> [types of materials] are most likely to interest public or community groups? What about those most challenging to reach groups? |
| Q7. | What would be most helpful to you in terms of information [evidence, practical examples of communication interventions, visual aids] that could be applied to communication with the public?               |
| Q8. | Do you have anything else you would like to add?                                                                                                                                                           |
|     | END INTERVIEW SCHEDULE                                                                                                                                                                                     |

Ruth Larbey and Emma Weitkamp (2020) 'Water scarcity communication in the UK: learning from water company communications following the 2018 heatwave' *Front. Environ. Sci.* | doi: 10.3389/fenvs.2020.578423
